# Supplementary material for: Development and Optimization of a Rapid In Vitro Micropropagation System for the Perennial Vegetable Night Lily, Hemerocallis citrina Baroni
Source: MDPI journal article supplement (doi:10.3390/agronomy14020244), 2024-01-24
Supplement: s1 [file s1]

**Supplemental file 2.** Key steps for rapid in vitro micropropagation of night lily through tissue culture.

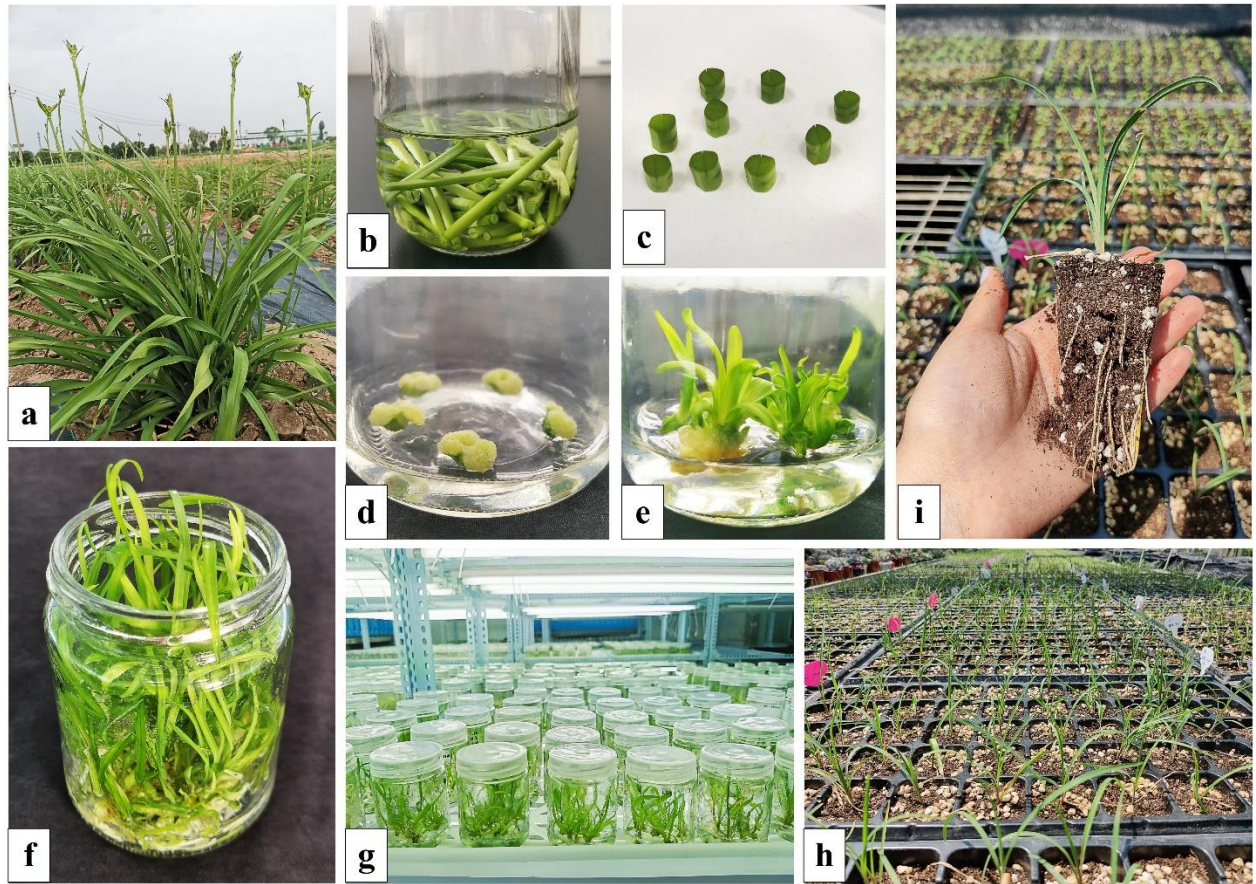

**Figure S1.** Key steps for rapid in vitro micropropagation of night lily through tissue culture. a) The night lily variety ‘Datong Huanghua’. b) Sterilization of scape explants. c) Preparation of explants from young flower stem (scape). d) Callus induction. e-f) Shoot regeneration. g) Large scale production of rooted seedlings in the culture room. h) Transplanting of seedlings. i) Seedlings ready to transplant to the field.
