# Supplementary material for: Development and Optimization of a Rapid In Vitro Micropropagation System for the Perennial Vegetable Night Lily, Hemerocallis citrina Baroni
Source: MDPI journal article supplement (doi:10.3390/agronomy14020244), 2024-01-24
Supplement: s1 [file s1]

**Supplemental File 1a.** Culture media for for night lily micropropagation.

**Murashige & Skoog (MS) medium(per 100ml)**

|                     |                                  |
|---------------------|----------------------------------|
| MS powder           | 0.44 g                           |
| Sucrose             | 3.0 g                            |
| Phytigel            | 0.2 g                            |
| H <sub>2</sub> O to | 100 mL                           |
| pH                  | 5.8-6.2 (Adjust with 1.0 M NaOH) |

**½ MS medium(per 100ml)**

|                     |                                  |
|---------------------|----------------------------------|
| MS powder           | 0.22 g                           |
| Sucrose             | 3.0 g                            |
| Phytigel            | 0.2 g                            |
| H <sub>2</sub> O to | 100 mL                           |
| pH                  | 5.8-6.2 (Adjust with 1.0 M NaOH) |

**¼ MS medium(per 100ml)**

|                     |                                  |
|---------------------|----------------------------------|
| MS powder           | 0.11 g                           |
| Sucrose             | 3.0 g                            |
| Phytigel            | 0.2 g                            |
| H <sub>2</sub> O to | 100 mL                           |
| pH                  | 5.8-6.2 (Adjust with 1.0 M NaOH) |

**Gamborg B-5 (B5) medium(per 100ml)**

|                     |                                  |
|---------------------|----------------------------------|
| B5 powder           | 0.32 g                           |
| Sucrose             | 3.0 g                            |
| Phytigel            | 0.2 g                            |
| H <sub>2</sub> O to | 100 mL                           |
| pH                  | 5.8-6.2 (Adjust with 1.0 M NaOH) |

**Chu N6 (N6) medium(per 100ml)**

|                     |                                  |
|---------------------|----------------------------------|
| N6 powder           | 0.40 g                           |
| Sucrose             | 3.0 g                            |
| Phytigel            | 0.2 g                            |
| H <sub>2</sub> O to | 100 mL                           |
| pH                  | 5.8-6.2 (Adjust with 1.0 M NaOH) |

**Supplemental File 1b.** Chemicals and stock solution preparation for night lily micropropagation.

| Reagents                               | Stock solution preparation                                                                       | Stock concentration | Vendors                                  | CAT # |
|----------------------------------------|--------------------------------------------------------------------------------------------------|---------------------|------------------------------------------|-------|
| Murashige & Skoog (MS)                 | -                                                                                                | -                   | PhytoTech Labs, USA                      | M519  |
| Gamborg B-5 (B5)                       | -                                                                                                | -                   | PhytoTech Labs, USA                      | G398  |
| Chu N6 (N6)                            | -                                                                                                | -                   | PhytoTech Labs, USA                      | C167  |
| Gellan Gum, CultureGel (Phytigel)      | -                                                                                                | -                   | Solarbio, Beijing, China                 | P8170 |
| Sucrose                                | -                                                                                                | -                   | Kaitong Chemical Reagent Co., Ltd, China | -     |
| Thidiazuron (TDZ)                      | Dissolve 0.1 g TDZ in 1 mL of 1 mol/L NaOH, then add dH <sub>2</sub> O to 10 mL                  | 10 mg/mL            | Solarbio, Beijing, China                 | T8050 |
| 6-benzylaminopurine (6-BA)             | Dissolve 0.02 g 6-BA in 1 mL of 1 mol/L NaOH, then add dH <sub>2</sub> O to 10 mL                | 2 mg/mL             | Solarbio, Beijing, China                 | A8170 |
| 2,4-dichlorophenoxyacetic acid (2,4-D) | Dissolve 0.01 g 2,4-D in 1 mL absolute ethanol, then add dH <sub>2</sub> O to 10 mL              | 1 mg/mL             | Solarbio, Beijing, China                 | D8100 |
| $\alpha$ -naphthaleneacetic acid (NAA) | Dissolve 0.01 g NAA in 1 mL absolute ethanol, then add dH <sub>2</sub> O to 10 mL                | 1 mg/mL             | Solarbio, Beijing, China                 | N8010 |
| 0.1% HgCl <sub>2</sub>                 | Dissolve 0.5 g HgCl <sub>2</sub> in 10 mL absolute ethanol, then add dH <sub>2</sub> O to 500 mL | 1 g/L               | Kermel, Tianjin, China                   | -     |
